# Supplementary material
Source: publisher figshare collection journal article supplement (https://tandf.figshare.com/articles/dataset/_/8971091)
Supplement: Supplementary file 1 [file 1]

Archive with 10 entries (10 files):
- Video 1.mov
- Video 2.mov
- Video 3.mov
- movie_1 (Converted).mov
- movie_2 (Converted).mov
- movie_3 (Converted).mov
- Supplementary Figure 1_190506.pptx
- Supplementary Figure 2_190506.pptx
- Supplementary Materials Merged_190506.pdf
- Supplementary Materials_190506.docx
